# Supplementary material for: MIG-seq: an effective PCR-based method for genome-wide single-nucleotide polymorphism genotyping using the next-generation sequencing platform
Source: PubMed Central journal article supplement (PMC4655332; doi:10.1038/srep16963), 2015-11-23
Supplement: srep16963-s1.pdf [file srep16963-s1.pdf]

## **Supplementary information**

MIG-seq: an effective PCR-based method for genome-wide single-nucleotide polymorphism genotyping using the next-generation sequencing platform

Yoshihisa Suyama<sup>1,\*</sup> and Yu Matsuki<sup>1</sup>

<sup>1</sup>Tohoku University, Kawatabi Field Science Center, Graduate School of Agricultural Science, 232-3 Yomogida, Naruko-onsen, Osaki, Miyagi 989-6711, Japan

\*suyama@m.tohoku.ac.jp

**Supplementary Table 1.** Sequences of MIG-seq primer set-2 for the 1st PCR

| Name                    | Sequences (5'–3')                                        |
|-------------------------|----------------------------------------------------------|
| Forward primers:        | (Tail + <b>anchor: CTG</b> ) + SSR + <b>anchor</b>       |
| (CTG) <sub>4</sub> AC-f | <u>CGCTCTTCCGATCT</u> <b>CTG</b> GCTGCTGCTGCT <b>GAC</b> |
| (GCT) <sub>4</sub> TG-f | <u>CGCTCTTCCGATCT</u> <b>CTG</b> GCTGCTGCTGCT <b>TG</b>  |
| (GTA) <sub>4</sub> TG-f | <u>CGCTCTTCCGATCT</u> <b>CTG</b> GTAGTAGTAGTAT <b>G</b>  |
| (GTT) <sub>4</sub> AG-f | <u>CGCTCTTCCGATCT</u> <b>CTG</b> GTTGTTGTTGTT <b>AG</b>  |
| Reverse primers:        | (Tail + <b>anchor: GAC</b> ) + SSR + <b>anchor</b>       |
| (CTG) <sub>4</sub> AC-r | TGCTCTTCCGATCT <b>GAC</b> GCTGCTGCTGCT <b>GAC</b>        |
| (GCT) <sub>4</sub> TG-r | TGCTCTTCCGATCT <b>GAC</b> GCTGCTGCTGCT <b>TG</b>         |
| (GTA) <sub>4</sub> TG-r | TGCTCTTCCGATCT <b>GAC</b> GTAGTAGTAGTAT <b>G</b>         |
| (GTT) <sub>4</sub> AG-r | TGCTCTTCCGATCT <b>GAC</b> GTTGTTGTTGTT <b>AG</b>         |

Underlined and boldface nucleotides denote tail and anchor sequences, respectively. The differences between forward and reverse primer sets lie only in their tail sequences. SSR; simple sequence repeat

**Supplementary Table 2.** Segregation of allelic variants, their goodness of fit to the expected 1:1 ratio and linkage groups for 43 putative SNP loci, in megagametophyte samples from a mother tree of *Picea abies*

| Locus | Genotype of the mother tree | Observed segregation in megagametophyte samples |          | P value<br>(Chi-square test)<br>* $P < 0.05$ | Linkage groups with complete linkage |
|-------|-----------------------------|-------------------------------------------------|----------|----------------------------------------------|--------------------------------------|
|       |                             | Allele-1                                        | Allele-2 |                                              |                                      |
| 15    | A / G                       | 6                                               | 10       | 0.317                                        |                                      |
| 40    | A / G                       | 11                                              | 5        | 0.134                                        | A                                    |
| 136   | G / T                       | 10                                              | 4        | 0.109                                        |                                      |
| 276   | C / T                       | 9                                               | 7        | 0.617                                        | B                                    |
| 277   | A / G                       | 5                                               | 11       | 0.134                                        |                                      |
| 343   | C / T                       | 9                                               | 7        | 0.617                                        |                                      |
| 353   | C / T                       | 7                                               | 8        | 0.796                                        |                                      |
| 416   | C / T                       | 7                                               | 8        | 0.796                                        |                                      |
| 433   | C / G                       | 6                                               | 10       | 0.317                                        |                                      |
| 437   | A / G                       | 6                                               | 10       | 0.317                                        |                                      |
| 560   | C / T                       | 7                                               | 9        | 0.617                                        |                                      |
| 666   | A / T                       | 7                                               | 9        | 0.617                                        |                                      |
| 718   | C / T                       | 10                                              | 6        | 0.317                                        |                                      |
| 756   | C / T                       | 12                                              | 4        | 0.046 *                                      |                                      |
| 776   | A / G                       | 8                                               | 8        | 1.000                                        |                                      |
| 923   | A / C                       | 6                                               | 9        | 0.439                                        |                                      |
| 993   | G / T                       | 13                                              | 3        | 0.012 *                                      | C                                    |
| 1005  | A / G                       | 9                                               | 6        | 0.439                                        |                                      |
| 1048  | A / G                       | 5                                               | 11       | 0.134                                        | D                                    |
| 1086  | C / T                       | 9                                               | 7        | 0.617                                        | B                                    |
| 1118  | A / C                       | 9                                               | 7        | 0.617                                        |                                      |
| 1311  | A / G                       | 8                                               | 8        | 1.000                                        |                                      |
| 1368  | A / G                       | 5                                               | 10       | 0.197                                        | A                                    |
| 1419  | A / C                       | 9                                               | 7        | 0.617                                        | E                                    |
| 1428  | C / T                       | 5                                               | 11       | 0.134                                        | D                                    |
| 1698  | A / C                       | 6                                               | 4        | 0.527                                        |                                      |
| 1750  | G / T                       | 8                                               | 3        | 0.132                                        | C                                    |
| 1768  | A / G                       | 12                                              | 4        | 0.046 *                                      |                                      |
| 1771  | C / T                       | 8                                               | 8        | 1.000                                        |                                      |
| 1853  | C / T                       | 7                                               | 9        | 0.617                                        |                                      |
| 1856  | G / T                       | 4                                               | 6        | 0.527                                        |                                      |
| 2025  | C / T                       | 7                                               | 9        | 0.617                                        |                                      |
| 2054  | A / G                       | 9                                               | 7        | 0.617                                        | E                                    |
| 2074  | A / G                       | 10                                              | 6        | 0.317                                        |                                      |
| 2080  | A / G                       | 8                                               | 8        | 1.000                                        |                                      |
| 2107  | C / T                       | 7                                               | 9        | 0.617                                        | F                                    |
| 2113  | C / T                       | 7                                               | 9        | 0.617                                        | F                                    |
| 2136  | C / T                       | 9                                               | 7        | 0.617                                        |                                      |
| 2148  | A / C                       | 12                                              | 4        | 0.046 *                                      |                                      |
| 2263  | C / G                       | 10                                              | 5        | 0.197                                        |                                      |
| 2315  | A / C                       | 7                                               | 9        | 0.617                                        |                                      |
| 2324  | G / T                       | 11                                              | 5        | 0.134                                        |                                      |
| 2402  | C / G                       | 11                                              | 5        | 0.134                                        |                                      |

**Supplementary Table 3.** Genotypes of seven microsatellite loci in 18 ramets (samples) of *Sasa palmata*. Three groups with identical genotypes (clones) are enclosed by a dotted line

| Sample ID | Locus          |     |              |     |              |     |              |     |              |    |              |    |              |     |
|-----------|----------------|-----|--------------|-----|--------------|-----|--------------|-----|--------------|----|--------------|----|--------------|-----|
|           | <i>Sasa718</i> |     | <i>BWSS1</i> |     | <i>BWSS3</i> |     | <i>BWSS4</i> |     | <i>BWSS5</i> |    | <i>BWSS7</i> |    | <i>BWSS8</i> |     |
| Spa01     | 161            | 161 | 109          | 109 | 140          | 140 | 93           | 97  | 75           | 75 | 97           | 97 | 109          | 109 |
| Spa02     | 148            | 173 | 109          | 109 | 170          | 170 | 93           | 97  | 75           | 75 | 88           | 93 | 109          | 109 |
| Spa03     | 148            | 173 | 109          | 109 | 170          | 170 | 93           | 97  | 75           | 75 | 88           | 93 | 109          | 109 |
| Spa04     | 161            | 179 | 109          | 109 | 140          | 140 | 93           | 97  | 75           | 75 | 86           | 88 | 109          | 109 |
| Spa05     | 150            | 165 | 105          | 105 | 140          | 170 | 101          | 103 | 75           | 75 | 88           | 88 | 109          | 109 |
| Spa06     | 161            | 173 | 109          | 109 | 170          | 170 | 97           | 97  | 75           | 75 | 88           | 93 | 109          | 109 |
| Spa07     | 171            | 173 | 109          | 109 | 187          | 187 | 97           | 103 | 75           | 75 | 88           | 97 | 109          | 109 |
| Spa08     | 171            | 173 | 109          | 109 | 187          | 187 | 97           | 103 | 75           | 75 | 88           | 97 | 109          | 109 |
| Spa09     | 171            | 173 | 109          | 109 | 187          | 187 | 97           | 103 | 75           | 75 | 88           | 97 | 109          | 109 |
| Spa10     | 165            | 165 | 109          | 109 | 140          | 140 | 97           | 103 | 75           | 75 | 86           | 86 | 109          | 109 |
| Spa11     | 161            | 163 | 109          | 109 | 140          | 170 | 95           | 101 | 75           | 75 | 88           | 88 | 109          | 109 |
| Spa12     | 148            | 167 | 109          | 109 | 170          | 170 | 101          | 101 | 75           | 75 | 88           | 88 | 109          | 109 |
| Spa13     | 161            | 163 | 109          | 111 | 140          | 183 | 97           | 103 | 75           | 75 | 88           | 95 | 109          | 109 |
| Spa14     | 161            | 169 | 109          | 109 | 140          | 191 | 97           | 99  | 75           | 75 | 82           | 86 | 109          | 109 |
| Spa15     | 161            | 165 | 109          | 109 | 140          | 140 | 95           | 95  | 75           | 75 | 88           | 88 | 109          | 109 |
| Spa16     | 148            | 163 | 109          | 111 | 140          | 170 | 93           | 101 | 75           | 75 | 88           | 97 | 109          | 109 |
| Spa17     | 148            | 163 | 109          | 111 | 140          | 170 | 93           | 101 | 75           | 75 | 88           | 97 | 109          | 109 |
| Spa18     | 163            | 165 | 109          | 109 | 140          | 140 | 103          | 103 | 75           | 75 | 86           | 88 | 109          | 109 |

**Supplementary Table 4.** Description of DNA extraction for the eight species analyzed by  
MIG-seq

| Species                                                                          | Method (kit)                                                | Amount of tissue used for DNA extraction (approx. mg, fresh weight) | Amount of DNA used as PCR template (ng) |
|----------------------------------------------------------------------------------|-------------------------------------------------------------|---------------------------------------------------------------------|-----------------------------------------|
| Norway spruce<br>( <i>Picea abies</i> )                                          | DNeasy Plant Mini Kit (Qiagen)                              | 0.01 (seed), 50 (leaf)                                              | 10–50                                   |
| Dwarf bamboo<br>( <i>Sasa palmata</i> )                                          | CTAB method*                                                | 50                                                                  | 50–100                                  |
| Nameko mushroom<br>( <i>Pholiota microspora</i> )                                | Illustra Nucleon PhytoPure (GE Healthcare)                  | 50                                                                  | 10–100                                  |
| Calanoida copepod<br>( <i>Eodiaptomus japonicus</i> )                            | GenElute Mammalian Genomic DNA Miniprep Kit (Sigma-Aldrich) | 0.006 (dry)                                                         | 2–3                                     |
| Japanese common sea cucumber<br>( <i>Apostichopus japonicus</i> )                | QuickGene DNA tissue kit S (Kurabo)                         | 5                                                                   | 10–20                                   |
| Predatory sea snail<br>( <i>Laguncula pulchella</i> )                            | DNeasy Blood & Tissue Kit (Qiagen)                          | 0.6–2.1                                                             | 10–20                                   |
| Carolina anole<br>( <i>Anolis carolinensis</i> )                                 | Wizard Genomic DNA Purification Kit (Promega)               | 5                                                                   | 50–100                                  |
| Lady's-slipper orchid<br>( <i>Cypripedium macranthos</i> var. <i>rebunense</i> ) | DNeasy Plant Mini Kit (Qiagen)                              | 20–50                                                               | 10–20                                   |

\*Reference: Murray, M.G. & Thompson, W.F. Rapid isolation of high molecular weight plant DNA. *Nucleic Acids Res.* **8**, 4321–4325 (1980).

**Supplementary Table 5. Sequences of six-base indices in the reverse primer for the 2nd PCR of MIG-seq**

| Index ID | Sequence | Index ID | Sequence | Index ID | Sequence | Index ID | Sequence |
|----------|----------|----------|----------|----------|----------|----------|----------|
| R001     | AACATA   | R097     | AAAGTG   | R193     | AACATT   | R289     | AACGCC   |
| R002     | AACTAG   | R098     | AACCTG   | R194     | AACTAA   | R290     | AAGGAC   |
| R003     | AAGACT   | R099     | AATGTA   | R195     | AAGCCA   | R291     | AAGTGG   |
| R004     | AAGTTG   | R100     | ACACTG   | R196     | AATTCT   | R292     | ACAATT   |
| R005     | AATTGT   | R101     | ACCGAG   | R197     | ACCACG   | R293     | ACGAAT   |
| R006     | ACCCGA   | R102     | ACGACG   | R198     | ACCTGC   | R294     | ACTAGC   |
| R007     | ACCTCA   | R103     | ACGCTC   | R199     | ACGACA   | R295     | AGATCA   |
| R008     | ACGGCT   | R104     | ACGTGA   | R200     | AGACCT   | R296     | AGCCTG   |
| R009     | ACGTAT   | R105     | ACTATC   | R201     | AGCCGA   | R297     | AGGATG   |
| R010     | ACTACT   | R106     | ACTGAC   | R202     | AGGACT   | R298     | ATCATG   |
| R011     | ACTCGT   | R107     | ACTTAA   | R203     | AGGCGC   | R299     | ATGTTG   |
| R012     | ACTGCG   | R108     | AGATCT   | R204     | ATGGAG   | R300     | CAAGGA   |
| R013     | AGAACG   | R109     | AGATGC   | R205     | CAACGT   | R301     | CACCTT   |
| R014     | AGAAGT   | R110     | AGCAAT   | R206     | CACCGG   | R302     | CATTAG   |
| R015     | AGAGTT   | R111     | AGCGAC   | R207     | CATGTA   | R303     | CCATAG   |
| R016     | AGCCTT   | R112     | AGCTTG   | R208     | CCACTG   | R304     | CCGGAT   |
| R017     | AGCTCC   | R113     | AGTGAT   | R209     | CCGATC   | R305     | CCTCGA   |
| R018     | AGTAGG   | R114     | ATATAC   | R210     | CGACCA   | R306     | CGACTC   |
| R019     | ATACCG   | R115     | ATCACT   | R211     | CGCTGA   | R307     | CGAGCC   |
| R020     | ATATGG   | R116     | ATCCGG   | R212     | CGGTAG   | R308     | CGGACC   |
| R021     | ATCATC   | R117     | ATCGTG   | R213     | CGTTAA   | R309     | CGTGGT   |
| R022     | ATCCTA   | R118     | ATGCTT   | R214     | CTACTT   | R310     | CGTTGG   |
| R023     | ATGCAC   | R119     | ATGGTA   | R215     | CTCTTG   | R311     | CTGACG   |
| R024     | ATGGCC   | R120     | ATGTGC   | R216     | CTTATG   | R312     | CTTCAT   |
| R025     | ATGTAA   | R121     | ATTCTC   | R217     | GAACAC   | R313     | GACGAC   |
| R026     | ATTAGC   | R122     | ATTTCC   | R218     | GACCAT   | R314     | GAGTTC   |
| R027     | ATTGCT   | R123     | CAATTA   | R219     | GAGCGA   | R315     | GATCTC   |
| R028     | CAAGCG   | R124     | CACTCC   | R220     | GATTCC   | R316     | GCCTAG   |
| R029     | CACGCA   | R125     | CATAGG   | R221     | GCCGGA   | R317     | GCTCAA   |
| R030     | CATACA   | R126     | CATCTG   | R222     | GCTAGG   | R318     | GCTGTG   |
| R031     | CATCAT   | R127     | CATTGC   | R223     | GCTGAT   | R319     | GGACAT   |
| R032     | CCACAT   | R128     | CCAATG   | R224     | GGAGTT   | R320     | GGATAA   |
| R033     | CCAAT    | R129     | CCACGA   | R225     | GGTATC   | R321     | GTAAGT   |
| R034     | CCGAGT   | R130     | CCGACA   | R226     | GTAGAG   | R322     | GTAGCA   |
| R035     | CCGTTG   | R131     | CCGCAC   | R227     | GTGTAC   | R323     | GTGTTA   |
| R036     | CCTGGC   | R132     | CCTACC   | R228     | GTTCCA   | R324     | TAACAA   |
| R037     | CGAGGT   | R133     | CGAAGG   | R229     | GTTGGA   | R325     | TACTCA   |
| R038     | CGATTT   | R134     | CGATAC   | R230     | TACGTG   | R326     | TAGCGG   |
| R039     | CGCCCT   | R135     | CGCAAC   | R231     | TAGCCT   | R327     | TAGTAT   |
| R040     | CGCTTC   | R136     | CGCGTT   | R232     | TCAACG   | R328     | TCATGC   |
| R041     | CGGATT   | R137     | CGGACG   | R233     | TCGGCT   | R329     | TCTACA   |
| R042     | CGTTCC   | R138     | CGTACT   | R234     | TCTTGT   | R330     | TGCCAA   |
| R043     | CTATCT   | R139     | CTACAA   | R235     | TGATTG   | R331     | TGCTGT   |
| R044     | CTCGAC   | R140     | CTATTC   | R236     | TGCGCA   | R332     | TGTAGA   |
| R045     | CTGATC   | R141     | CTCTCG   | R237     | TGGCTC   | R333     | TTACGC   |
| R046     | CTGGAT   | R142     | CTGCCA   | R238     | TTAACC   | R334     | TTAGCG   |
| R047     | CTGTGA   | R143     | CTGTAC   | R239     | TTATGA   | R335     | TTCAAT   |
| R048     | CTTGAA   | R144     | CTTACG   | R240     | TTGAAC   | R336     | TTGAGA   |
| R049     | GAACTC   | R145     | GAAATG   | R241     | AAGGCG   | R337     | AAGCAT   |
| R050     | GAAGAT   | R146     | GAATCG   | R242     | AATACG   | R338     | AATCGT   |
| R051     | GAAGCC   | R147     | GACTTG   | R243     | AATGGC   | R339     | AATGTT   |
| R052     | GAATGT   | R148     | GAGCCA   | R244     | ACATCG   | R340     | ACATTC   |
| R053     | GACACA   | R149     | GAGTGA   | R245     | ACCGCT   | R341     | ACCATA   |
| R054     | GACCGA   | R150     | GATCCT   | R246     | ACTAAG   | R342     | ACCTAT   |
| R055     | GAGATA   | R151     | GCAAGG   | R247     | ACTCTG   | R343     | ACGTGT   |
| R056     | GAGTAT   | R152     | GCCGGT   | R248     | AGCACA   | R344     | ACTGAA   |
| R057     | GATAAT   | R153     | GCGACT   | R249     | AGCGGC   | R345     | AGCATC   |
| R058     | GATTAA   | R154     | GCTCAT   | R250     | ATAGTG   | R346     | AGCTAC   |

---

|      |        |      |         |      |        |      |        |
|------|--------|------|---------|------|--------|------|--------|
| R059 | GCCATC | R155 | GCTTAC  | R251 | ATGATA | R347 | AGGCTT |
| R060 | GCCTGC | R156 | GGACCA  | R252 | ATTCCT | R348 | ATGCCG |
| R061 | GCTAGC | R157 | GGATAG  | R253 | CAATCC | R349 | ATTGCC |
| R062 | GCTCTC | R158 | GGCACT  | R254 | CACGAT | R350 | CAATGG |
| R063 | GCTTCT | R159 | GGCTAT  | R255 | CATTGA | R351 | CATGAC |
| R064 | GGAGTG | R160 | GGGTGC  | R256 | CCATGT | R352 | CCAAGC |
| R065 | GGATTC | R161 | GGTGAC  | R257 | CCGTAA | R353 | CCGAAG |
| R066 | GGCCAC | R162 | GTACGA  | R258 | CGAGAT | R354 | CCTAAT |
| R067 | GGCTGA | R163 | GTATAA  | R259 | CGGCTA | R355 | CGAATA |
| R068 | GGTACA | R164 | GTGAAG  | R260 | CGTATT | R356 | CTAAGG |
| R069 | GTAACC | R165 | GTGCCT  | R261 | CTAACA | R357 | CTAGCT |
| R070 | GTAGCT | R166 | GTTCTA  | R262 | CTCAAC | R358 | CTCGAA |
| R071 | GTATGC | R167 | TAAACG  | R263 | CTGATT | R359 | CTGCGT |
| R072 | GTGATT | R168 | TAAC TG | R264 | CTTCTA | R360 | CTTGCA |
| R073 | GTTAGT | R169 | TACAAG  | R265 | GAAGGC | R361 | GACTCT |
| R074 | GTTGCA | R170 | TACTTA  | R266 | GACGTA | R362 | GATACT |
| R075 | TAACGC | R171 | TAGGTA  | R267 | GATAAC | R363 | GATTAT |
| R076 | TAATCC | R172 | TATCGT  | R268 | GCACCG | R364 | GCAAGA |
| R077 | TACGAC | R173 | TATCTC  | R269 | GCGGTA | R365 | GCATTA |
| R078 | TAGATC | R174 | TATGCG  | R270 | GCTCGC | R366 | GCGTGA |
| R079 | TATACC | R175 | TCCATT  | R271 | GCTTCA | R367 | GCTCTT |
| R080 | TATGGC | R176 | TCCTAC  | R272 | GGCTCC | R368 | GGAACT |
| R081 | TCCCTA | R177 | TCGCAT  | R273 | GTAATG | R369 | GGACGA |
| R082 | TCGAGG | R178 | TCGGAG  | R274 | GTGCAA | R370 | GGCTTA |
| R083 | TCGCTG | R179 | TCGTAA  | R275 | GTTACC | R371 | GTACTA |
| R084 | TCTATG | R180 | TCGTGC  | R276 | GTTGCG | R372 | GTGGCC |
| R085 | TCTGGT | R181 | TCTCGC  | R277 | TAATCT | R373 | GTTCAC |
| R086 | TCTTCG | R182 | TCTGTA  | R278 | TACTGG | R374 | TACCTC |
| R087 | TGACAT | R183 | TGAAGC  | R279 | TAGGTT | R375 | TAGAGT |
| R088 | TGAGTA | R184 | TGAGGG  | R280 | TCCACC | R376 | TCCGCG |
| R089 | TGCACG | R185 | TGATGT  | R281 | TCTCGG | R377 | TCTGAG |
| R090 | TGCTTT | R186 | TGCGTG  | R282 | TGACGG | R378 | TGAATC |
| R091 | TGGTGA | R187 | TGGACC  | R283 | TGCCGC | R379 | TGATAT |
| R092 | TTACAC | R188 | TGTGCT  | R284 | TGCTTC | R380 | TGCGAG |
| R093 | TTCTCA | R189 | TTAGCA  | R285 | TGTTCC | R381 | TGGAGC |
| R094 | TTGACT | R190 | TTCCGC  | R286 | TTAGAC | R382 | TGTTGC |
| R095 | TTGCGT | R191 | TTCGTA  | R287 | TTCGTT | R383 | TTCTCG |
| R096 | TTTACA | R192 | TTGCTA  | R288 | TTGCTG | R384 | TTGGCA |

---

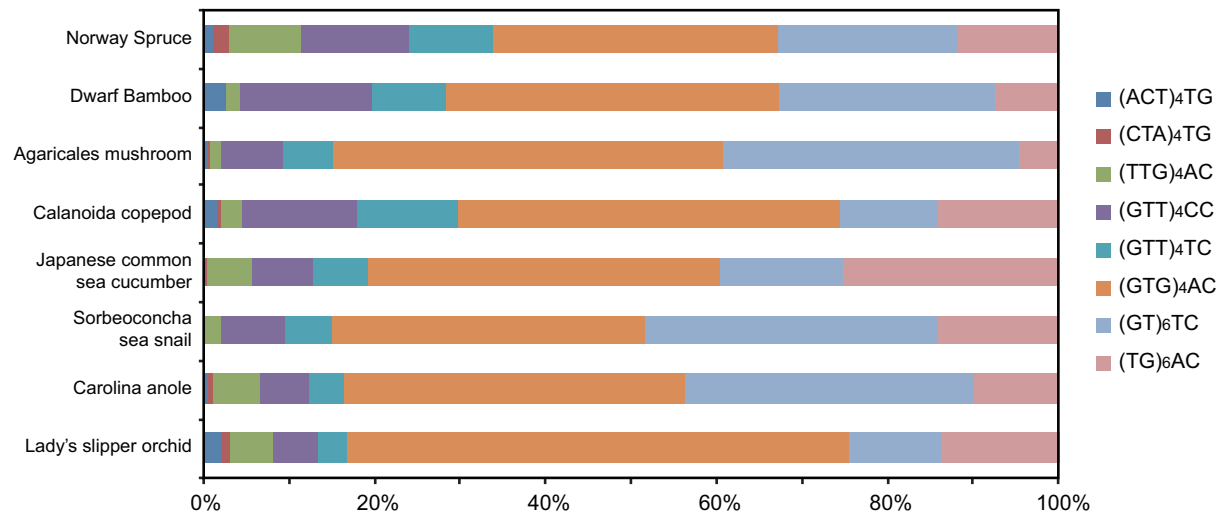

**Supplementary Figure 1.** Differences in the number of amplified reads among eight primers used for the 1st PCR



Copy and rename 'Amplicon' folder in OSDisk(C)/Illumina/MiSeq Control Software/Recipe/V3/

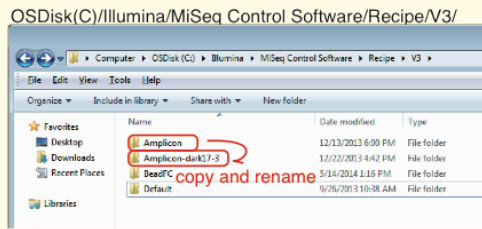

Modify the protocol of sequence reading program.

OSDisk(C)/Illumina/MiSeq Control Software/Recipe/V3/Amplicon-dark17-3/Protocol/2Read1Index.xml

Original "2Read1Index.xml"

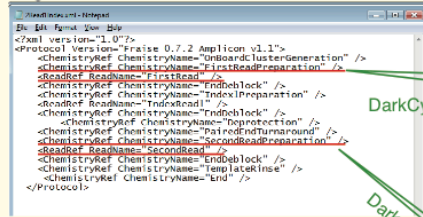

Modified "2Read1Index.xml" for DarkCycle

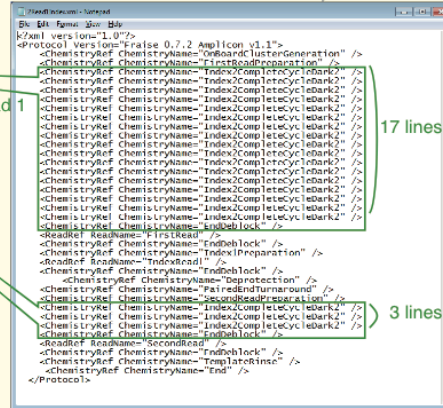

To skip the first 17 bases of Read 1,  
Between  
<ChemistryRef ChemistryName="FirstReadPreparation" />  
and  
<ReadRef ReadName="FirstRead" />,  
insert the following line 17 times  
<ChemistryRef ChemistryName="Index2CompleteCycleDark2" />  
and the last part of insertion, insert the following line  
<ChemistryRef ChemistryName="EndDeblock" />

To skip the first 3 bases of Read 2,  
Between  
<ChemistryRef ChemistryName="SecondReadPreparation" />  
and  
<ReadRef ReadName="SecondRead" />,  
insert the following line 3 times  
<ChemistryRef ChemistryName="Index2CompleteCycleDark2" />  
and the last line of insertion, insert the following line  
<ChemistryRef ChemistryName="EndDeblock" />

Create a sample sheet as usual, then open it with text editor, and change "Amplicon" to "Amplicon-dark17-3" on "Chemistry" line.

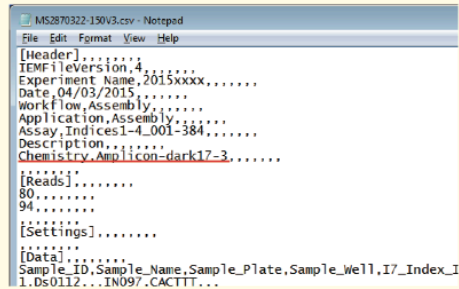

**Supplementary Figure 2.** Procedure for setting the DarkCycle in the MiSeq Control Software

Edit "SamplePrepkits" and "Applications" folders in OSDisk(C)/Program Files (x86)/Illumina/Illumina Experimental Manager/

- In "SamplePrepkits" folder, copy an existing file ( "TruSeq LT.txt" etc.).  
Change [Name] and [PlateExtension] column, and replace the index list of [P7].  
Save the file as the same name of [name] column.

Original "TreSeq LT.txt"

```
TruSeq LT.txt - Notepad
File Edit Format View Help
[Version]
1
[Name]
TruSeq LT
[PlateExtension]
1-481
[Settings]
Adapter1 AGATCGGAAGAGCACACGTCTGAACTCCAGTCA
AdapterRead2 AGATCGGAAGAGCGTCGTGTAGGGAAAGAGTGT
[P7]
A001 ATCAGC
A002 CGATGT
A003 TTAGCC
A004 TGACCA
A005 ACAGTG
A006 GCCAAT
A007 CAGATC
A008 AC TTGA
A009 GATCAG
A010 TAGLTT
A011 TTTTAT
```

Modified file for original indices

```
Indices1-4_001-384.txt - Notepad
File Edit Format View Help
[Version]
1
[Name]
Indices1-4_001-384
[PlateExtension]
1-481
[P7]
IN001 TATGTT
IN002 CTAGTT
IN003 AGTCTT
IN004 CACTTT
IN005 ACAATT
IN006 TCAGGT
IN007 TCAGGT
IN008 ASCCGT
IN009 ATACGT
IN010 AGTAGT
IN011 ACAGGT
IN012 CCGAGT
IN013 CACTCT
IN014 ACTTCT
```

save as same name

Caution: the sequence of listed index must be the reverse complement of index sequence of primer oligo.

Example: primer sequence

R001\_AACATA: CAAGCAGAAGACGGCATAACGATAGTACGAGTAAACATAGTGACTGGAGTTTCAGACGTGCGTGCTCTCCGATCTGAC

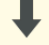

Listed sequence in index list

TATGTT

- Edit "Assembly.txt" in "Applications" folder.

Add the modified sample prep kit to the list of [Compatible Sample Prep kits]

The added sample prep kit will be found in Illumina Experimental Manager

```
Assembly.txt - Notepad
File Edit Format View Help
[Version]
1
[Workflow Name]
Assembly
[Display Name]
Assembly
[Category]
Small Genome Sequencing
[Compatible Sample Prep Kits]
TruSeq LT
Nextera XT
Nextera XT v2 Set A
Nextera XT v2 Set B
Nextera XT v2 Set C
Nextera XT v2 Set D
Nextera
TruSeq HT
Nextera Mate Pair
Indices1-4_001-384
[Settings]
OptionalGenome
```

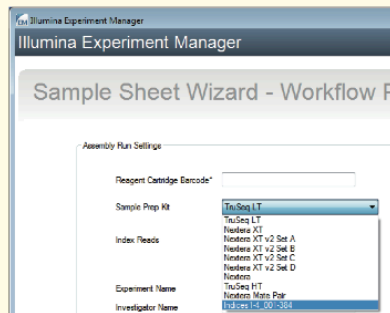

**Supplementary Figure 3.** Procedure for setting the original indices in the Illumina Experimental Manager in the program files of the MiSeq operation system

**a**

|       | Spa01 | 02  | 03 | 04  | 05  | 06  | 07  | 08  | 09 | 10  | 11  | 12  | 13  | 14  | 15  | 16  | 17 |
|-------|-------|-----|----|-----|-----|-----|-----|-----|----|-----|-----|-----|-----|-----|-----|-----|----|
| Spa02 | 137   |     |    |     |     |     |     |     |    |     |     |     |     |     |     |     |    |
| Spa03 | 110   | 5   |    |     |     |     |     |     |    |     |     |     |     |     |     |     |    |
| Spa04 | 101   | 106 | 97 |     |     |     |     |     |    |     |     |     |     |     |     |     |    |
| Spa05 | 85    | 85  | 72 | 63  |     |     |     |     |    |     |     |     |     |     |     |     |    |
| Spa06 | 94    | 101 | 96 | 85  | 71  |     |     |     |    |     |     |     |     |     |     |     |    |
| Spa07 | 113   | 118 | 96 | 88  | 95  | 110 |     |     |    |     |     |     |     |     |     |     |    |
| Spa08 | 120   | 116 | 92 | 92  | 95  | 111 | 8   |     |    |     |     |     |     |     |     |     |    |
| Spa09 | 79    | 89  | 73 | 65  | 76  | 81  | 6   | 2   |    |     |     |     |     |     |     |     |    |
| Spa10 | 114   | 107 | 98 | 80  | 76  | 79  | 111 | 123 | 93 |     |     |     |     |     |     |     |    |
| Spa11 | 130   | 117 | 97 | 97  | 101 | 112 | 124 | 122 | 92 | 117 |     |     |     |     |     |     |    |
| Spa12 | 122   | 95  | 67 | 87  | 78  | 111 | 102 | 110 | 78 | 107 | 129 |     |     |     |     |     |    |
| Spa13 | 121   | 95  | 86 | 85  | 77  | 81  | 113 | 113 | 81 | 86  | 104 | 103 |     |     |     |     |    |
| Spa14 | 123   | 107 | 83 | 116 | 90  | 105 | 139 | 135 | 95 | 146 | 118 | 112 | 108 |     |     |     |    |
| Spa15 | 95    | 90  | 73 | 78  | 64  | 87  | 101 | 103 | 77 | 85  | 109 | 98  | 96  | 110 |     |     |    |
| Spa16 | 126   | 108 | 99 | 91  | 95  | 90  | 94  | 100 | 82 | 108 | 120 | 116 | 94  | 124 | 90  |     |    |
| Spa17 | 109   | 92  | 80 | 74  | 83  | 68  | 80  | 86  | 71 | 92  | 101 | 89  | 73  | 96  | 78  | 6   |    |
| Spa18 | 140   | 118 | 87 | 109 | 88  | 105 | 95  | 105 | 79 | 111 | 109 | 119 | 105 | 127 | 100 | 102 | 83 |

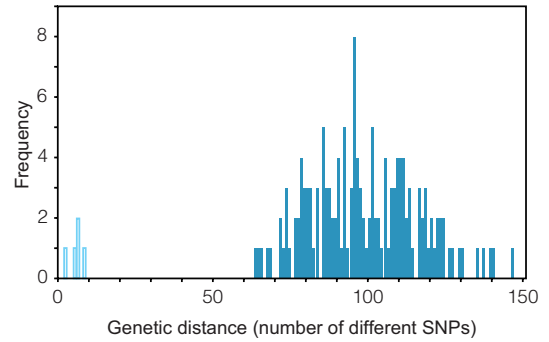**b**

|       | Spa01 | 02 | 03 | 04 | 05 | 06 | 07 | 08 | 09 | 10 | 11 | 12 | 13 | 14 | 15 | 16 | 17 |
|-------|-------|----|----|----|----|----|----|----|----|----|----|----|----|----|----|----|----|
| Spa02 | 78    |    |    |    |    |    |    |    |    |    |    |    |    |    |    |    |    |
| Spa03 | 70    | 3  |    |    |    |    |    |    |    |    |    |    |    |    |    |    |    |
| Spa04 | 70    | 68 | 65 |    |    |    |    |    |    |    |    |    |    |    |    |    |    |
| Spa05 | 68    | 67 | 62 | 54 |    |    |    |    |    |    |    |    |    |    |    |    |    |
| Spa06 | 68    | 77 | 71 | 67 | 59 |    |    |    |    |    |    |    |    |    |    |    |    |
| Spa07 | 76    | 76 | 75 | 73 | 72 | 81 |    |    |    |    |    |    |    |    |    |    |    |
| Spa08 | 81    | 80 | 78 | 77 | 75 | 85 | 2  |    |    |    |    |    |    |    |    |    |    |
| Spa09 | 69    | 66 | 63 | 59 | 65 | 71 | 3  | 2  |    |    |    |    |    |    |    |    |    |
| Spa10 | 68    | 80 | 78 | 64 | 63 | 75 | 83 | 87 | 82 |    |    |    |    |    |    |    |    |
| Spa11 | 69    | 72 | 68 | 74 | 75 | 80 | 82 | 87 | 76 | 75 |    |    |    |    |    |    |    |
| Spa12 | 81    | 67 | 58 | 68 | 63 | 81 | 74 | 78 | 65 | 70 | 90 |    |    |    |    |    |    |
| Spa13 | 80    | 67 | 65 | 61 | 56 | 60 | 77 | 80 | 63 | 63 | 75 | 79 |    |    |    |    |    |
| Spa14 | 73    | 73 | 63 | 80 | 68 | 79 | 85 | 93 | 83 | 98 | 74 | 84 | 81 |    |    |    |    |
| Spa15 | 66    | 55 | 54 | 62 | 58 | 62 | 72 | 80 | 68 | 64 | 72 | 69 | 62 | 75 |    |    |    |
| Spa16 | 89    | 75 | 74 | 76 | 72 | 66 | 78 | 83 | 77 | 86 | 86 | 81 | 74 | 96 | 63 |    |    |
| Spa17 | 85    | 71 | 66 | 62 | 64 | 60 | 67 | 72 | 65 | 75 | 77 | 70 | 62 | 86 | 54 | 6  |    |
| Spa18 | 84    | 64 | 60 | 82 | 78 | 80 | 67 | 76 | 71 | 84 | 79 | 77 | 62 | 80 | 61 | 65 | 59 |

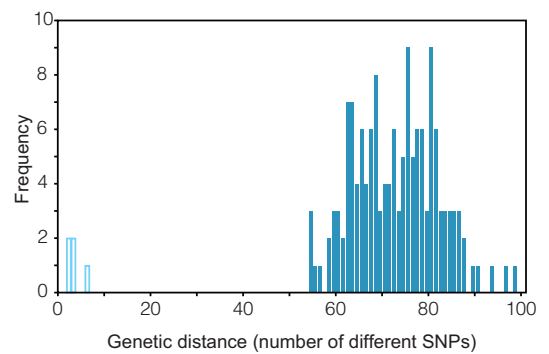**c**

|       | Spa01 | 02 | 03 | 04 | 05 | 06 | 07 | 08 | 09 | 10 | 11 | 12 | 13 | 14 | 15 | 16 | 17 |
|-------|-------|----|----|----|----|----|----|----|----|----|----|----|----|----|----|----|----|
| Spa02 | 40    |    |    |    |    |    |    |    |    |    |    |    |    |    |    |    |    |
| Spa03 | 37    | 3  |    |    |    |    |    |    |    |    |    |    |    |    |    |    |    |
| Spa04 | 30    | 33 | 33 |    |    |    |    |    |    |    |    |    |    |    |    |    |    |
| Spa05 | 32    | 35 | 32 | 30 |    |    |    |    |    |    |    |    |    |    |    |    |    |
| Spa06 | 47    | 44 | 40 | 28 | 39 |    |    |    |    |    |    |    |    |    |    |    |    |
| Spa07 | 31    | 38 | 37 | 30 | 37 | 45 |    |    |    |    |    |    |    |    |    |    |    |
| Spa08 | 35    | 41 | 39 | 36 | 40 | 50 | 0  |    |    |    |    |    |    |    |    |    |    |
| Spa09 | 30    | 39 | 37 | 29 | 37 | 43 | 1  | 1  |    |    |    |    |    |    |    |    |    |
| Spa10 | 31    | 25 | 21 | 24 | 38 | 37 | 28 | 32 | 27 |    |    |    |    |    |    |    |    |
| Spa11 | 34    | 30 | 27 | 28 | 28 | 48 | 34 | 39 | 34 | 37 |    |    |    |    |    |    |    |
| Spa12 | 34    | 27 | 27 | 32 | 36 | 39 | 35 | 42 | 38 | 28 | 35 |    |    |    |    |    |    |
| Spa13 | 44    | 29 | 27 | 39 | 36 | 43 | 42 | 44 | 43 | 32 | 44 | 41 |    |    |    |    |    |
| Spa14 | 36    | 33 | 30 | 38 | 33 | 40 | 35 | 38 | 34 | 35 | 33 | 32 | 30 |    |    |    |    |
| Spa15 | 33    | 33 | 31 | 31 | 25 | 33 | 39 | 43 | 36 | 24 | 28 | 37 | 26 | 35 |    |    |    |
| Spa16 | 48    | 38 | 35 | 34 | 35 | 40 | 36 | 41 | 35 | 35 | 43 | 32 | 38 | 35 | 36 |    |    |
| Spa17 | 48    | 36 | 35 | 35 | 38 | 40 | 36 | 40 | 33 | 33 | 42 | 31 | 38 | 37 | 37 | 2  |    |
| Spa18 | 38    | 29 | 29 | 32 | 39 | 40 | 28 | 30 | 27 | 27 | 34 | 37 | 24 | 34 | 22 | 27 | 27 |

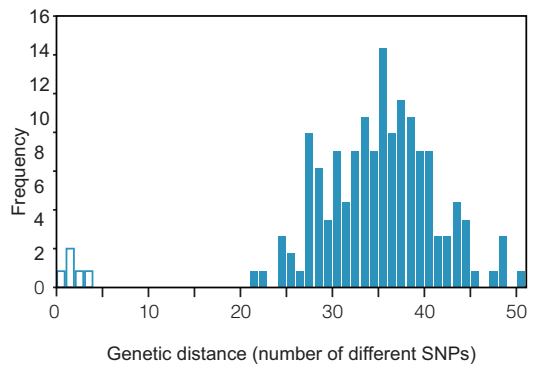

**Supplementary Figure 4.** Examples of clone identification by MIG-seq analysis based on different parameters (the minimum depth of coverage required to create a stack ( $m$ ) = 5, 5 and 20; the minimum number of populations in a locus ( $r$ ) = 0.5, 0.75 and 0.75 for **a**, **b** and **c**, respectively) used in the data analysis (see Figure 2 and Methods). Matrix of the differences between pairwise numbers of SNPs (left) and a histogram showing the frequency distribution of the differences between the pairwise numbers of SNPs (right) are presented.
